# Supplementary material for: Insights into the role of sulfated glycans in cancer cell adhesion and migration through use of branched peptide probe
Source: PubMed Central journal article supplement (PMC4891694; doi:10.1038/srep27174), 2016-06-03
Supplement: srep27174-s1.pdf [file srep27174-s1.pdf]

**Insights into the role of sulfated glycans in cancer cell adhesion and migration through use of branched peptide probe**

Jlenia Brunetti,<sup>a\*</sup> Lorenzo Depau,<sup>a</sup> Chiara Falciani,<sup>b</sup> Mariangela Gentile,<sup>c</sup> Elisabetta Mandarini,<sup>a</sup> Giulia Riolo,<sup>a</sup> Pietro Lupetti,<sup>c</sup> Alessandro Pini<sup>a,b</sup> and Luisa Bracci<sup>a,b</sup>

a University of Siena, Department of Medical Biotechnologies, Siena 53100, Italy

b SetLance srl, via Fiorentina 1, Siena 53100, Italy

c University of Siena, Department of Life Sciences, Siena 53100, Italy

\* corresponding author [jlenia.brunetti@unisi.it](mailto:jlenia.brunetti@unisi.it)

## Supplementary material

**Figure S1.** Movie of PANC-1 cell migration in wound healing assay without NT4 peptide (control). CytoSMART Lux 10x System was used to take pictures every 10 min for a total of 22 h.

**Figure S2.** Movie of PANC-1 cell migration in wound healing assay with 10  $\mu$ M NT4 peptide. CytoSMART Lux 10x System was used to take pictures every 10 min for a total of 22 h.

**Figure S3.** Movie of PANC-1 cell migration in a Matrigel wound healing assay without NT4 peptide (control). CytoSMART Lux 10x System was used to take pictures every 7.5 min for a total of 24 h.

**Figure S4.** Movie of PANC-1 cell migration in a Matrigel wound healing assay with 10  $\mu$ M NT4 peptide. CytoSMART Lux 10x System was used to take pictures every 7.5 min for a total of 24 h.

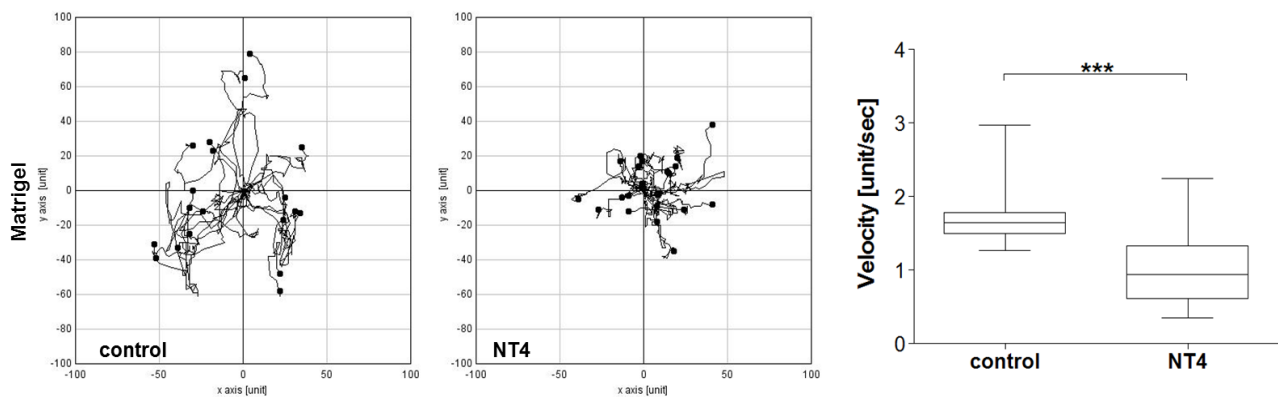

**Figure S5.** Directionality of cancer cell migration analyzed by time lapse microscopy using an in vitro wound healing assay in the presence of Matrigel. PANC-1 cancer cells were seeded on each side of a culture insert, covered with Matrigel and then incubated with and without 10  $\mu$ M NT4 (central panels and left panels, respectively). Cells were tracked every 15 min for 10 hours post-wounding and their paths plotted on a polar grid. Each plot represents 22 individual cell tracks. Velocity (unit/sec; where unit correspond to nm) of each analysed cell is reported in the box plot graph (right panels) where the median value is indicated by the line inside each box. \*\*\*  $p < 0.001$  calculated using one-tailed Student t-test.
